## 15 **Abstract**

16 Bacteria can adapt to stressful conditions through mutations affecting the RNA  
17 polymerase core subunits that lead to beneficial changes in transcription. In response to selection  
18 with rifampicin (RIF), mutations arise in the RIF resistance determining region (RRDR) of *rpoB*  
19 that reduce antibiotic binding. These changes can also alter transcription and thereby have  
20 pleiotropic effects on bacterial fitness. Here, we studied the evolution of resistance in *Bacillus*  
21 *subtilis* to the synergistic combination of RIF and the  $\beta$ -lactam cefuroxime (CEF). Two  
22 independent evolution experiments led to the recovery of a single *rpoB* allele (S487L) that was  
23 able to confer resistance to RIF and CEF through a single mutation. Two other common RRDR  
24 mutations made the cells 32x more sensitive to CEF (H482Y) or led to only modest CEF  
25 resistance (Q469R). The diverse effects of these three mutations on CEF resistance are correlated  
26 with differences in the expression of peptidoglycan (PG) synthesis genes and in the levels of two  
27 metabolites crucial in regulating PG synthesis, glucosamine-6-phosphate (GlcN-6-P) and UDP-  
28 N-acetylglucosamine (UDP-GlcNAc). We conclude that RRDR mutations can have widely  
29 varying effects on pathways important for cell wall biosynthesis, and this may restrict the  
30 spectrum of mutations that arise during combination therapy.

## 31 **Importance**

32 Rifampicin (RIF) is one of the most valued drugs in the treatment of tuberculosis. TB treatment  
33 relies on a combination therapy, and for multidrug resistant strains may include  $\beta$ -lactams.  
34 Mutations in *rpoB* present a common route for emergence of resistance to RIF. In this study,  
35 using *B. subtilis* as a model, we evaluate the emergence of resistance for the synergistic  
36 combination of RIF and the  $\beta$ -lactam cefuroxime (CEF). One clinically-relevant *rpoB* mutation  
37 conferred resistance to both RIF and CEF, whereas two others increased CEF sensitivity. We  
38 were able to link these phenotypes to accumulation of specific PG precursors. Mainly, UDP-  
39 GlcNAc through its GlmR mediated influence on GlmS activity has a strong impact on CEF  
40 resistance. Since these mutations are clinically relevant, these effects on CEF sensitivity may  
41 help refine the use of  $\beta$ -lactams in TB therapy.

## 42 Introduction

43 Bacteria adapt to environmental stresses by coordinated changes in transcription  
44 described as bacterial stress responses (1). However, when these phenotypic processes are  
45 overwhelmed and the majority of cells are either killed or growth inhibited, there is strong  
46 selective pressure for the emergence of adaptive mutations that confer resistance (2). Mutations  
47 in *rpoB/rpoC*, encoding the  $\beta$  and  $\beta'$  subunits of the RNA polymerase (RNAP) core enzyme, can  
48 facilitate adaptation to a variety of environmental and antibiotic stresses (3-6). However, the  
49 pleiotropic nature of mutations affecting the core RNAP subunits has made it challenging to  
50 discern the specific basis of such phenotypes (7). One exception is rifampicin (RIF) resistance  
51 (8). RIF binds to the  $\beta$ -subunit of RNAP to suppress transcription, and substitutions in RpoB  
52 inhibit RIF-binding, resulting in drug resistance (9). Importantly, such mutations are localized to  
53 the RIF-binding pocket and define a RIF-resistance determining region (RRDR). These RRDR  
54 changes dramatically reduce RIF-binding, and can also have other less well understood effects  
55 on RNA polymerase function (10).

56 RRDR mutations often have collateral effects, such as reduced growth fitness (11) and  
57 altered susceptibility to other antibiotics (12). Accordingly, the ability of RIF to select RNAP  
58 mutations has been used as a tool for altering cell physiology (13). One possibility is that the  
59 mutant RNAP is altered in its biochemical properties or interactions with regulatory factors, and  
60 this leads to a change in the transcriptional landscape. For instance, selection of RIF resistance in  
61 *Bacillus subtilis* led to strains defective in sporulation, providing early support for the idea that  
62 the genetic program of sporulation might require modifications of RNAP (14). Further, altered  
63 expression of metabolic enzymes might account for the effects of *rpoB* mutations on the ability  
64 to grow on diverse carbon sources (15). In *Mycobacterium tuberculosis* (MTB), RIF resistant

65 *rpoB* mutants display an altered cell wall metabolism, perhaps due to effect on the channeling of  
66 metabolites into cell wall precursors (16, 17).

67         Since *rpoB* mutations may have global effects on cell physiology, the RRDR mutations  
68 that emerge in response to RIF selection can be influenced by other features of the growth  
69 environment. This phenomenon has been explored in *B. subtilis*, where both the frequency and  
70 spectrum of RRDR mutations is altered in diverse environments (including that of a spaceflight!)  
71 (18-20). In a clinical context, RIF is administered as part of a multidrug therapy for the treatment  
72 of MTB. Thus, it is important to consider the influence of other antibiotics on acquisition of *rpoB*  
73 mutations conferring RIF resistance. More generally, it is important to understand the  
74 interactions between co-administered drugs and the impact of evolution of resistance to one drug  
75 on susceptibility to the partner drug.

76         Here, we explore the physiological and genetic interactions between RIF and the cell wall  
77 inhibiting  $\beta$ -lactam cefuroxime (CEF). We demonstrate that these two antibiotics are synergistic  
78 against *B. subtilis*, and co-selection with these two antibiotics led only to RRDR mutations.  
79 However, under these co-selection conditions the spectrum of RRDR mutations was reduced.  
80 When commonly arising RRDR mutations were characterized, only one mutation was identified  
81 to simultaneously confer high level RIF and CEF resistance. The effects of RRDR mutations on  
82 CEF resistance correlated with changes in the expression of peptidoglycan synthesis enzymes  
83 and the levels of key intermediates. These findings highlight the ability of RRDR mutations to  
84 have divergent effects on microbial physiology.

## 85 **Results**

### 86 **Rifampicin (RIF) and cefuroxime (CEF) exhibit synergy against *B. subtilis***

87           A synergistic interaction between  $\beta$ -lactams and RIF has been reported against gram-  
88 positive bacteria, including both methicillin-resistant staphylococci (21) and mycobacteria (22).  
89 We chose to test for synergy in *B. subtilis* between RIF and the cephalosporin cefuroxime (CEF).  
90 CEF, with an MIC of 5.12  $\mu\text{g}/\text{mL}$  (SI Figure 1A), acts by preferentially binding to and inhibiting  
91 the activity of class A PBPs, enzymes involved in the polymerization of PG precursors (23).  
92 Using a checkerboard assay, we found the combination of RIF and CEF to be strongly  
93 synergistic with a zero interaction potency (ZIP) score (24) of  $>10$  over a range of antibiotic  
94 concentrations (Table 1, SI Table 3). Values for the combination of 0.06  $\mu\text{g}/\text{mL}$  RIF with  
95 increasing concentrations of CEF have been listed in the table for illustration. Full dataset  
96 including other concentrations is in SI Table 3. On treatment with sub-MIC concentrations of  
97 CEF (up to 0.64  $\mu\text{g}/\text{mL}$ ), the lag phase was increased by no more than 3 hrs (Figure 1A). A sub-  
98 MIC concentration of RIF (0.06  $\mu\text{g}/\text{mL}$ ) also led to an increase in lag phase (from  $<1.5$  hrs to  $\sim 5$   
99 hrs). However, these cells were now very sensitive to growth inhibition by CEF, with as little as  
100 0.08  $\mu\text{g}/\text{mL}$  CEF leading to a lag phase of  $\sim 10$  hrs (Figure 1B). Similarly, the presence of sub-  
101 MIC CEF (0.64  $\mu\text{g}/\text{mL}$ ) reduced the RIF MIC by 4-fold from 0.125 to 0.03  $\mu\text{g}/\text{mL}$  (SI Figure  
102 1B, 1C). This change corresponds to a fractional inhibitory concentration index (FICI) (25) of  
103 0.36, further supporting the conclusion that these two antibiotics act synergistically.

104

## 105 **Co-treatment with RIF and CEF selects for mutations in *rpoB***

106 Drug synergy is a clinically attractive feature of antibiotic chemotherapy. However, drug  
107 interactions also have the potential to influence the evolution of resistance (26). Both RIF and  
108 CEF susceptibility is influenced by mutations in RNA polymerase (27, 28). We therefore sought  
109 to explore how co-treatment with both RIF and CEF affected the evolution of resistance. We  
110 hypothesized that the combination of RIF+CEF might select for the emergence of mutations at  
111 novel loci. We evolved *B. subtilis* by repeated passage (10x) in the presence of three alternative  
112 drug combinations (Figure 2A): 0.06  $\mu\text{g/mL}$  RIF with 2.56  $\mu\text{g/mL}$  CEF (0.5X MIC of the  
113 individual drugs), 0.12  $\mu\text{g/mL}$  RIF with 2.56  $\mu\text{g/mL}$  CEF (MIC of RIF and 0.5X MIC of CEF),  
114 0.06  $\mu\text{g/mL}$  RIF with 5.12  $\mu\text{g/mL}$  CEF (0.5X MIC of RIF and MIC of CEF). Under all three  
115 conditions, cells developed resistance to both drugs by the fourth passage, as measured by a  
116 decrease in diameter in a zone of inhibition (ZOI) assay (Figure 2B-C). The absence of red and  
117 blue bars in Figure 2B represents complete loss of ZOI, and hence high resistance to RIF.  
118 Interestingly, when evolved in the presence of the highest CEF concentration (5.12  $\mu\text{g/mL}$ ), cells  
119 were only able to acquire low-level RIF resistance.

120 To identify the genetic changes associated with resistance, we performed whole genome  
121 sequencing (WGS) of single colonies recovered from the 4<sup>th</sup> passage of selection. Interestingly,  
122 all three evolved strains had mutations in the RRDR of *rpoB* (Table 2). This suggests that even in  
123 the presence of two drugs, the most facile path to resistance to both drugs is through alterations  
124 in the RDDR region of *rpoB*. The two independently evolved strains (A and B) that were  
125 selected with sub-MIC levels of CEF both acquired high level RIF resistance with an identical  
126 mutation, S487L. The RRDR region is highly conserved (29), and this mutation corresponds to

127 S531L in *E. coli* and S450L, which is the most commonly occurring RIF resistance mutation in  
128 *M. tuberculosis* (30). Strain C, evolved with CEF at its MIC (5.12  $\mu\text{g/mL}$ ), acquired an *rpoB*  
129 P520L mutation that contributed comparatively low level RIF resistance (31). This suggests that  
130 the selective pressure imposed by higher CEF concentrations might preclude the acquisition of  
131 high RIF resistance through typical RRDR mutations. We sought to confirm this finding by  
132 repeating the experiment with ten additional biological replicates. Five tubes were grown with  
133 0.06  $\mu\text{g/mL}$  RIF and 5.12  $\mu\text{g/mL}$  CEF (1x MIC), and five tubes with 0.06  $\mu\text{g/mL}$  RIF and 10.24  
134  $\mu\text{g/mL}$  CEF (2x MIC). In support of the previous experiment, none of the strains acquired high  
135 RIF resistance even after 10 passages. Sequencing of the RRDR region from eight isolates led to  
136 four strains with atypical RRDR region mutations that led to modest increases in RIF and high  
137 CEF resistance (L489S, A478V (2 isolates), S468P), and four that did not contain RRDR  
138 mutations. Thus, high levels of CEF seem to impede the emergence of most RRDR region  
139 mutations that are known to confer high level RIF resistance in favor of mutations that confer  
140 CEF resistance and only partial RIF resistance.

141

#### 142 ***rpoB* mutants exhibit altered susceptibility to other cell wall acting antibiotics**

143 In addition to characterizing RIF resistant mutants selected by both RIF and CEF (Table  
144 2), we also isolated *rpoB* mutants on agar containing high concentrations (512  $\mu\text{g/mL}$ ) of RIF  
145 alone. Two additional mutations (H482Y and Q469R) were recovered, which have been  
146 identified in prior studies of RIF resistance in *B. subtilis* (32). Mutations in the RRDR residues  
147 corresponding to *B. subtilis* S487, H482 and Q469 (Table 3) correspond to more than 90% of  
148 RIF resistant MTB clinical isolates. Because of the clinical prevalence of these mutations, and  
149 the cross-resistance of the S487L mutant to CEF, we characterized the CEF sensitivity of the



150 H482Y and Q469R RIF resistant mutants (Table 3 and Figure 3A). In contrast to mutants  
151 evolved under combination selection (S487L), the H482Y mutation made cells highly  
152 susceptible to CEF (32X more sensitive than WT), whereas the Q469R mutation led to a modest  
153 increase in CEF resistance (2X more resistant than WT). Combination treatment using RIF and  
154  $\beta$ -lactams has been proposed as a potential drug therapy for *M. tuberculosis* (33). We therefore  
155 tested whether two common RIF resistant mutations in *M. tuberculosis* (S531L and H526Y) also  
156 alter CEF susceptibility. Indeed, both S531L and H526Y were 2 to 4-fold more sensitive to CEF  
157 compared to H37Rv.

158         Although H482Y frequently emerges in cells subject to RIF selection, this mutation is  
159 disfavored in the presence of CEF since it greatly increases CEF sensitivity. Such interactions,  
160 where emergence of resistance to one antibiotic increases the susceptibility to another are  
161 beneficial in combination therapies (34). We next tested the sensitivity of the three clinically  
162 relevant RIF resistance mutants towards additional  $\beta$ -lactams and other antibiotics that target the  
163 cell wall (Figure 3B). All  $\beta$ -lactams inhibit the formation of PG layer by targeting different PBPs  
164 with varying affinities (35). Three additional  $\beta$ -lactams (oxacillin, ampicillin and penicillin) were  
165 similar to CEF with S487L increasing resistance, and H482Y conferring sensitivity. Neither  
166 effect was as strong as for CEF, which can be attributed to CEF having the highest affinity for  
167 PBP1, the most abundant and primary class A PBP (23).

168         Extending beyond  $\beta$ -lactams, we also tested the sensitivity of the mutants for nisin and  
169 vancomycin, both of which bind lipid II and prevent PG synthesis and crosslinking and, in the  
170 case of nisin, can form membrane pores (36, 37). Compared to WT, none of the *rpoB* mutants  
171 had a significant difference in sensitivity towards either of these drugs (Figure 3B). In contrast,  
172 all the mutants (and especially Q469R) were more susceptible towards fosfomycin (Figure 3B),

173 which inhibits the MurA-dependent synthesis of UDP-N-acetylmuramic acid from UDP-N-  
174 acetylglucosamine (UDP-GlcNAc) (38). As a control we also tested the sensitivity of the mutants  
175 against drugs acting on other cellular processes: chloramphenicol which inhibits protein  
176 synthesis (39); triclosan which inhibits fatty acid synthesis (40) and paraquat which generates  
177 ROS toxicity in the cells (41). None of the mutants had a significant difference in the sensitivity  
178 against these drugs (SI Figure 2). In conclusion, the predominant *rpoB* mutations associated with  
179 high RIF resistance had varying levels of sensitivity to cell wall acting drugs.

180

### 181 ***rpoB* mutations alter the expression of genes affecting PG synthesis**

182 Based on our antibiotic sensitivity results, we hypothesized that these RRDR mutations  
183 may change the interaction of RNAP with promoters or regulators involved in the expression of  
184 PG synthesis genes. We therefore sought to evaluate the transcript levels of representative PG  
185 synthesis genes (*glmS*, *glmM*, *glmU*, *murA* and *ponA*) and two genes that function to divert PG  
186 intermediates back into glycolysis (*gamA*, *nagB*) (Figure 4A). PG synthesis branches from the  
187 fructose-6-phosphate node in glycolysis when GlmS converts fructose-6-phosphate to  
188 glucosamine-6-phosphate (GlcN-6-P) (42, 43). GlcN-6-P is isomerized by GlmM into GlcN-1-P,  
189 which is converted by GlmU to UDP-GlcNAc. MurA initiates synthesis of the second sugar  
190 required for PG synthesis, UDP-MurNAc. We included *ponA*, which encodes PBP1, the primary  
191 aPBP involved in PG synthesis during vegetative growth and a major target of CEF inhibition  
192 (23, 35). PG synthesis can also be supported by import of amino sugars such as GlcNAc present  
193 in the growth medium. Catabolism of GlcNAc leads to GlcN-6-P, a branchpoint metabolite that  
194 can be used by GlmM to support PG synthesis or when in excess routed into glycolysis through  
195 the GamA (44) and NagB (45) enzymes (Figure 4A).

196 In the case of the CEF<sup>R</sup> S487L and Q469R mutants, *glmU* and *murA* were expressed at  
197 significantly higher levels compared to WT cells, and other tested genes were unchanged (Figure  
198 4B). CEF resistance was notably not correlated with upregulation of *ponA*, encoding a major  
199 target for CEF. In the case of the CEF<sup>S</sup> H482Y mutant, *glmM* and *ponA* were expressed at lower  
200 levels than WT. We hypothesized that reduced *glmM* levels (in the H482Y mutant) might be  
201 correlated with an increase in expression of *gamA* and *nagB*. However, mRNA levels of these  
202 genes were reduced relative to WT in these mutants. None of the mutants had a difference in  
203 their growth kinetics in the absence of any drug (SI Figure 3), suggesting that the altered drug  
204 sensitivity of the mutants did not result from slower growth. Thus, we conclude that CEF  
205 resistance is correlated with increased transcript levels for some enzymes in PG synthesis (*glmU*,  
206 *murA*), whereas sensitivity is correlated with reduced mRNA levels for other enzymes (*glmM*,  
207 *ponA*, *gamA*, *nagB*). Whether these changes in mRNA levels are due to effects of RRDR  
208 mutations on RNAP activity at the corresponding promoters or are an indirect effect of other  
209 changes in metabolism is not yet clear.

210 Metabolic flux can be regulated by changes in enzyme activity or enzyme expression. For  
211 PG synthesis, GlmS is under complex regulation. The level of *glmS* mRNA is regulated by  
212 GlcN-6-P activated mRNA cleavage by the *glmS* ribozyme (46). However, the mRNA level of  
213 *glmR* was little changed in the RRDR mutants relative to WT (Figure 4C). In addition, GlmS  
214 activity is allosterically activated by GlmR (47). GlmR activity is antagonized by complex  
215 formation with YvcJ in the presence of high UDP-GlcNAc (48). Therefore, we sought to  
216 determine whether RRDR mutations affect the levels of metabolites that might impact PG  
217 synthesis.

218

## 219 **RRDR mutations alter the levels of key PG intermediates**

220 To monitor the impact of RRDR mutations on metabolite pools we performed untargeted  
221 metabolomics. We focused our attention of the levels of the two key regulatory intermediates  
222 noted above, GlcN-6-P and UDP-GlcNAc (Figure 4A), and pyruvate, which is indicative of the  
223 flux of fructose-6-phosphate into glycolysis (49). The Q469R strain did not show any significant  
224 difference in the levels of these metabolites, so we focused on the differences between the CEF<sup>R</sup>  
225 (S487L) and CEF<sup>S</sup> (H482Y) strains (Figure 5).

226 For the CEF<sup>R</sup> S487L mutant, we observed an increase in GlcN-6-P and a decrease in  
227 UDP-GlcNAc. Since UDP-GlcNAc regulates GlmS activity through the YvcJ/GlmR pathway  
228 (Figure 4A), low UDP-GlcNAc will lead to high GlmS activity, which might account for  
229 elevated GlcN-6-P. We also noted elevated mRNA levels for *glmU* and *murA* (Figure 4B). Thus,  
230 we conclude that the S487L mutant has changes in both gene expression and metabolite levels  
231 consistent with a higher rate of PG synthesis. Although one might expect that elevated GlcN-6-P  
232 could reduce *glmS* mRNA levels (by ribozyme cleavage) and increase the expression of *gamA*  
233 and *nagB*, our qRT-PCR results showed no evidence for these changes (Figure 4B), suggesting  
234 that GlcN-6-P has not reached levels needed to trigger these responses.

235 In contrast, the CEF<sup>S</sup> H482Y mutant had elevated levels of UDP-GlcNAc. In this case,  
236 we predict that the high UDP-GlcNAc will cause sequestration of GlmR in a YvcJ:GlmR:UDP-  
237 GlcNAc complex and thereby prevent GlmR stimulation of GlmS activity (48). By restricting  
238 GlmS activity, this could reduce flux of fructose-6-P into PG and contribute to the CEF sensitive  
239 phenotype. Thus, the most striking correlation to emerge from the metabolomics analysis is the  
240 correlation between UDP-GlcNAc and CEF sensitivity. Further, our data support the idea that a

241 key function of UDP-GlcNAc is as a feedback regulator of GlmS activity, as mediated by the  
242 GlmR/YvcJ pathway (48).

243

#### 244 **The ability of UDP-GlcNAc to modulate PG synthesis is dependent on GlmR**

245 We used epistasis studies to determine if the correlation of UDP-GlcNAc levels and CEF  
246 sensitivity is in fact mediated by the role of UDP-GlcNAc as a negative regulator of GlmR  
247 activity. The CEF<sup>R</sup> S487L mutant has reduced UDP-GlcNAc levels that could result in increased  
248 activity of the GlmR regulator and this, in turn, could lead to elevated PG synthesis and  
249 contribute to antibiotic resistance. Consistent with this model, the elevated CEF<sup>R</sup> of the S487L  
250 mutant is lost in a strain additionally lacking *glmR* (Figure 6). Conversely, in the CEF<sup>S</sup> H482Y  
251 mutant UDP-GlcNAc levels are high, and therefore we predict that GlmR will be largely non-  
252 functional due to sequestration in a YvcJ:GlmR:UDP-GlcNAc complex (48). Both the H482Y  
253 and the *glmR* mutations individually make cells CEF<sup>S</sup> but these two mutations are not additive in  
254 the H482Y *glmR* double mutant (Figure 6.). This supports our hypothesis that H482Y and *glmR*  
255 function in the same pathway, and that H482Y has effectively inactivated GlmR function by  
256 altering metabolism leading to a high level of UDP-GlcNAc.

257

#### 258 **Perturbing flux of amino sugars can alter CEF sensitivity**

259 We hypothesize that the CEF sensitivity of the H482Y mutant is due to restricted GlmS  
260 activity resulting from elevated UDP-GlcNAc levels. Therefore, we sought to bypass GlmS by  
261 supplementing cells with GlcNAc, which has been shown to increase the level of GlcN-6-P (50).  
262 Indeed, in the presence of GlcNAc there was a significant increase in CEF resistance for the

263 H482Y mutant (Figure 7A). The growth of the cells in liquid media in the presence of 0.04  
264  $\mu\text{g/mL}$  of CEF was also significantly better when LB was supplemented with GlcNAc (SI Figure  
265 4). These results suggest that increasing flux of sugars into PG synthesis restores CEF resistance  
266 to H482Y by bypassing GlmS. Consistently, if we instead delete *gamA* (Figure 4A) the flux of  
267 amino sugars present in the growth medium into glycolysis is restricted, and this also increases  
268 CEF resistance. We next tested the impact of increasing the flow of GlcNAc into UDP-GlcNAc  
269 on CEF resistance. We ectopically induced expression of the GlmM phosphoglucosamine mutase  
270 (PNGM) and *PgcA\**, an allele of phosphoglucomutase with increased PNGM activity (51).  
271 Neither gene was able to increase CEF resistance (Figure 7B). This is consistent with the  
272 hypothesis that GlmS activity is restricted, GlcN-6-P is a limiting metabolite for PG synthesis,  
273 and only the import of amino sugars from outside the cell can bypass this restriction.

274 Conversely, the CEF<sup>R</sup> S487L mutant did not exhibit any difference in CEF sensitivity in  
275 the presence or absence of 20 mM GlcNAc, or upon deletion of *gamA* (Figure 7A). This is  
276 consistent with our hypothesis that this strain is not restricted in the flux of F6P into GlcN-6-P.  
277 In this case, induction of *glmM* or *pgcA\** actually led to a slight increase in CEF sensitivity. In  
278 contrast, induction of *PgcA*, which has comparatively low PNGM activity (51), had no effect.  
279 We speculate that with this strain, which has high GlcN-6-P levels (Figure 7B), further increase  
280 in synthesis of amino sugars leads to a metabolic imbalance. Finally, for the Q469R mutant,  
281 which did not exhibit any significant depletion or accumulation of the PG intermediates, GlcNAc  
282 addition did not change CEF susceptibility. Similar to S487L, induction of *glmM* or *pgcA\** in  
283 Q469R also led to a slight increase in CEF sensitivity (Figure 7B).

284

285 **Discussion**

286 Drug interactions have a strong impact on evolution of resistance (52). Here, we  
287 evaluated the emergence of resistance to a combination of a  $\beta$ -lactam (CEF) and rifampicin  
288 (RIF). These two drugs are synergistic in *B. subtilis*, as shown also for other bacteria (53-56). We  
289 used *in vitro* evolution followed by whole-genome sequencing to identify mutations that enable  
290 growth in the presence of this dual selection. Strikingly, only one single RRDR mutation  
291 (S487L) emerged that confers high level resistance to both antibiotics. With CEF at or above the  
292 MIC, the acquisition of high-level RIF resistance was restricted. When this selection was  
293 repeated and colonies screened specifically for RRDR mutations we identified several other  
294 mutations, not commonly associated with RIF resistance, that confer high level CEF resistance  
295 and only modestly increase RIF resistance.

296 These results highlight the importance of RRDR mutations in RIF resistance (by reducing  
297 RIF binding to the  $\beta$ -subunit), and the ability of *rpoB* mutations to also confer resistance to other  
298 antibiotics by less direct mechanisms. In the presence of CEF, only a limited set of mutations can  
299 simultaneously lead to CEF and RIF resistance, and these were found in the RRDR. In fact, other  
300 common RRDR mutations that confer high level RIF resistance were either sensitive (H482Y) or  
301 had lower resistance to CEF (Q469R). In MTB both mutants corresponding to S487L and  
302 H482Y were sensitive to CEF compared to WT. The collateral sensitivity to CEF on acquiring  
303 RIF resistance is favorable when considering multidrug treatment (57). Further, co-treatment  
304 with  $\beta$ -lactams and RIF may constrain emergence of RIF resistance.

305 Previously, *rpoB* mutations have been described that alter susceptibility to cell wall  
306 inhibiting drugs such as  $\beta$ -lactams (6, 27), vancomycin, and daptomycin (58). However,  
307 resistance mutations directly selected by each of these drugs typically do not map to RRDR (6).  
308 However, some RIF resistance mutations in the RRDR not only decrease RIF binding, but can

309 lead to alterations in the cell wall (16). In MTB, the frequently occurring H526Y RRDR mutant  
310 is very sensitive to cell wall inhibitors, and to the deletion of genes encoding auxiliary functions  
311 related to cell wall synthesis and division (59). Similarly, we report here that *B. subtilis* RRDR  
312 mutations can lead to either sensitivity or resistance to an antibiotic (CEF) that inhibits PG  
313 synthesis.

314         The identification of S487L (CEF<sup>R</sup>) and H482Y (CEF<sup>S</sup>) mutants in *B. subtilis* presents a  
315 useful tool to understand the impact of RRDR mutations on cell wall homeostasis. Using  
316 transcriptomic and metabolomic studies, we present evidence for the importance of altered  
317 metabolite levels (GlcN-6-P and UDP-GlcNAc) in affecting  $\beta$ -lactams susceptibility.  
318 Specifically, higher levels of UDP-GlcNAc in H482Y are correlated with CEF sensitivity, which  
319 we ascribe to a loss of GlmR-mediated activation of GlmS. Metabolic feeding studies and  
320 genetic epistasis suggests this to be a direct cause of the altered resistance. Conversely, the  
321 S487L mutant maintains high levels of GlcN-6-P and low levels of UDP-GlcNAc, and in this  
322 strain GlmR-mediated activation of GlmS is critical for maintaining PG synthesis. Although not  
323 the intent of this study, our results have served to highlight the importance of GlmR as a key  
324 regulator of metabolic flux through GlmS, the enzyme that shunts carbon from  
325 glycolysis/gluconeogenesis into amino sugar and PG synthesis. Drugs that inhibit PG synthesis  
326 cause a buildup of cell wall intermediates including UDP-GlcNAc (60). When UDP-GlcNAc  
327 levels increase, it binds to GlmR and flux into PG synthesis may be reduced. Since GlmR is  
328 conserved in many bacteria, including MTB (61, 62), these types of effects are important to  
329 consider when considering mechanisms of adaptation and resistance to cell wall antibiotics.

330         Here, we have validated the central role of GlmR as a regulator, and UDP-GlcNAc as a  
331 regulatory metabolite, using the divergent effects of the S487L and H482Y RRDR mutations on



332 CEF resistance. We have used three experimental perturbations to alter the availability of  
333 metabolites to support PG synthesis: GlcNAc supplementation and restriction of catabolism  
334 (*gamA* deletion), elevated expression of *glmM* or *pgcA\**, and deletion of *glmR* (Figure 8). The  
335 CEF<sup>R</sup> S487L mutant maintains high levels of GlcN-6-P and low levels of UDP-GlcNAc. Thus, in  
336 this strain GlmR is active and maintains relatively higher flux of PG synthesis and is better able  
337 to tolerate high levels of CEF. As predicted, if GlmR is deleted the cells become more sensitive  
338 to CEF (Figure 6). Due to the high levels of GlcN-6-P in this strain, induction of *glmM* and  
339 *pgcA\**, combined with elevated *glmU* expression (Figure 4), may lead to elevation of UDP-  
340 GlcNAc. High UDP-GlcNAc, in turn, will inactivate GlmR, restrict flux to PG synthesis, and  
341 increase CEF sensitivity (Figure 7B, 8). In the case of CEF<sup>S</sup> H482Y, the cells already have high  
342 levels of UDP-GlcNAc, which restricts PG synthesis and confers CEF sensitivity. The only  
343 manipulation that increased the resistance of this strain was supplementation with GlcNAc or  
344 *gamA* deletion, both of which increase PG synthesis independent of GlmR (Figure 7A, 8).

345 In summary, we have shown that RIF<sup>R</sup> RRDR mutants have altered susceptibility to  $\beta$ -  
346 lactams due to altered levels of PG metabolites, especially UDP-GlcNAc. RRDR mutations have  
347 a global impact on the transcriptome of the cells and can lead to pleiotropic effects. Analyzing  
348 the expression levels of PG synthesis genes did not reveal why UDP-GlcNAc levels are altered  
349 by RRDR mutations, but the downstream effects of this altered metabolite can account for  
350 differences in sensitivity to  $\beta$ -lactams.  $\beta$ -lactams are some of the most powerful antibiotics and  
351 are being considered in TB therapy with RIF (33). Thus, this work on evolution of resistance to  
352 the combination of RIF and CEF, the collateral sensitivity to CEF on acquisition of RIF  
353 resistance, and the differential response of *rpoB* mutants to CEF will benefit future studies  
354 designing effective drug treatments.

355

## 356 **Materials and Methods**

### 357 **Bacterial strains, plasmids and growth conditions**

358 Bacterial strains used in this study are listed in SI Table 1. All stains were grown in lysogeny  
359 broth (LB) medium at 37°C. Liquid cultures were aerated on an orbital shaker at 280 rpm.  
360 Glycerol stocks were streaked on LB agar plates and incubated overnight at 37°C. *rpoB* was  
361 amplified using the primers mentioned in SI Table 2. Mutations in the RIF-resistance  
362 determining region (RRDR) of *rpoB* were confirmed by Sanger sequencing at the Biotechnology  
363 Resources core facility at Cornell University using primer 9286. *glmR::erm* and *gamA::erm* were  
364 ordered from the BKE collection available at the Bacillus Genetic Stock Centre (BGSC) (63).  
365 The gene deletion with the erythromycin cassette was then transformed into the desired strains  
366 by natural competence induced in modified competence (MC) medium. The cassette was  
367 removed using pDR244 as described previously (63). Transformation was done using  
368 chromosomal DNA with selection on plates having 1 µg/mL of erythromycin and 25 µg/mL  
369 lincomycin. The deletion was confirmed by PCR with check primers listed in Supplementary  
370 Table 2. Strains with inducible expression of *glmM* (HB16910), *pgcA\** (HB16946) and *pgcA*  
371 (HB16945) were made using chromosomal DNA from strains from a previous study (51). Genes  
372 were ectopically expressed at *amyE* locus under promoter  $P_{spac(hy)}$  and selection of transformants  
373 was performed in the presence of chloramphenicol (10 µg/mL).

### 374 **Growth kinetics and MIC determinations**

375 A bioscreen C growth curve analyzer (Growth curves USA, NJ) was used to monitor the growth  
376 of the strains. Initially, cultures were grown up to ~0.4 OD<sub>600</sub> in 5 mL culture tubes. 1 µL of this

377 culture was inoculated in each well of honeycomb 100 well plates containing 200  $\mu$ L of LB  
378 media. OD<sub>600</sub> was monitored every 15 min up to 24 hrs with constant shaking at 37°C. For MIC  
379 determination, two-fold increase in the drug concentration was screened ranging from 0.04 to  
380 10.24  $\mu$ g/mL for CEF and 0.075 to 4  $\mu$ g/mL for RIF. The minimum concentration of drug having  
381 at least 90% growth inhibition compared to the untreated control after 8 hrs of treatment was  
382 considered as MIC for the drug. Control cells reach stationary phase within 8 hrs (OD<sub>600</sub> ~ 1.0).  
383 Percent inhibition was calculated as follows:

$$\% \text{ inhibition} = \left( 1 - \frac{(\text{avg } OD_{600} \text{ of treated cells})}{(\text{avg } OD_{600} \text{ of control cells})} \right) \times 100$$

384 Average OD<sub>600</sub> was calculated from 3 biological replicates.

### 385 Synergy quantification

386 Checkerboard assays were used to determine the interaction between RIF and CEF (64) with 2-  
387 fold dilutions of both drugs. 1  $\mu$ L of 0.4 OD cultures was added in each well of 200  $\mu$ L media  
388 containing either or both drugs. The MIC of the drug combination was determined as mentioned  
389 in the previous section. To quantify the interaction between the two drugs we calculated both a  
390 fractional inhibitory concentration index (FICI) and a ZIP score. The formula to calculate FICI is  
391 as follows:

$$FICI = \left( \frac{MIC \text{ of drug A in combination}}{MIC \text{ of drug A alone}} \right) + \left( \frac{MIC \text{ of drug B in combination}}{MIC \text{ of drug B alone}} \right)$$

392 If the value of FICI is  $\leq 0.5$ , the interaction was considered to be synergistic (65). The ZIP score  
393 was calculated using synergy finder (24). A ZIP score of  $> 10$  indicates synergy between the two  
394 drugs.

## 395 **Evolution and Whole Genome Sequencing**

396 Wild-type (WT) cells were evolved under the combined treatment of RIF and CEF. Initially, WT  
397 cells were grown up to 0.4 OD<sub>600</sub>. 25 µL of these cells were added in 5 mL of LB containing: No  
398 drug; 0.06 µg/mL of RIF with 2.56 µg/mL of CEF; 0.12 µg/mL of RIF with 2.56 µg/mL of CEF;  
399 0.06 µg/mL of RIF with 5.12 µg/mL of CEF. The cultures were allowed to grow overnight. The  
400 next day, 25 µL of the overnight cultures were transferred in fresh tubes containing 5 mL of LB  
401 with the same conditions. This designated the first passage. All cultures were evolved for 10  
402 passages. Cells from each passage were stored as glycerol stocks. For experiments, the frozen  
403 stocks were streaked on LB agar plates and a representative single colony was picked from each  
404 passage and analyzed for their RIF and CEF sensitivities. These single colonies were again  
405 stored as glycerol stocks. Chromosomal DNA was extracted from the selected single colonies  
406 using Qiagen DNA extraction kit and was sent for Whole Genome Sequencing. Sequencing was  
407 done using the Illumina platform at the Microbial Genome Sequencing Center (MiGS,  
408 Pittsburgh). The results were trimmed, mapped, and aligned with reference WT (NC\_000964.3)  
409 genome sequence using CLC genomics workbench.

## 410 **Disc diffusion assay**

411 Drug susceptibilities of the mutants were screened by determining the zone of inhibition using a  
412 disc diffusion assay. Cultures were grown up to ~0.4 OD<sub>600</sub>. 100 µL of this culture was mixed  
413 with 4 mL of top agar (0.75% agar). Top agar was kept at 50°C to prevent it from solidifying.  
414 The mix of agar and culture was poured onto a 15 mL LB agar (1.5 %) plates. This was allowed  
415 to air-dry for 30 min. A 6 mm Whatmann paper filter disc was then put on the top agar. The  
416 required amount of drug was added on the disc immediately. The plates were incubated  
417 overnight at 37°C. The diameter of the clear zone of inhibition/low density growth (ZOI/ZOLD)

418 was measured the next day. For all histograms, the Y-axis starts from 6 mm which is the disc  
419 diameter. For experiments with GlcNAc supplementation, 20 mM GlcNAc was added in both the  
420 top agar and LB agar plates. For strains having the inducible promoter  $P_{spac(hy)}$ , the agar was  
421 made with 1 mM IPTG. Amount of drugs used on the disc: CEF – 25  $\mu$ g; RIF – 25  $\mu$ g; Oxacillin  
422 – 3  $\mu$ g; Ampicillin – 15  $\mu$ g; Penicillin G – 20U; Nisin – 100  $\mu$ g; Vancomycin- 10  $\mu$ g;  
423 Fosfomycin- 75  $\mu$ g; Chloramphenicol – 8  $\mu$ g; Triclosan – 5  $\mu$ g; Paraquat – 8  $\mu$ L from 10 mM  
424 stock.

### 425 **Real-time PCR**

426 Gene expression was determined by real-time PCR using primers mentioned in Supplementary  
427 Table 2. Cultures were grown up to  $\sim 0.4$  OD<sub>600</sub>. RNA was purified from 1.5 mL of cells using  
428 the RNeasy Kit from Qiagen as per the manufacturer's instructions. The isolated RNA was then  
429 given a DNase treatment with TURBO DNA-free Kit (Invitrogen, REF AM1907).  
430 Approximately 15  $\mu$ g of RNA was incubated with 2  $\mu$ L DNase and 2  $\mu$ L Buffer at 37°C for 15  
431 min followed by a 5 min incubation with the DNase inactivating agent. The samples were then  
432 centrifuged at 8000 rpm for 3 min and the supernatant was collected in a fresh micro centrifuge  
433 tube. cDNA was prepared with 2  $\mu$ g of the treated RNA in 20  $\mu$ L total volume of reaction mix  
434 using High-capacity cDNA reverse transcription kit from Applied Biosystems (REF 4368814).  
435 The cDNA was further diluted by 1:10 to obtain a final concentration of 10 ng/ $\mu$ L. The gene  
436 expression levels were measured using 10 ng of cDNA using 0.5  $\mu$ M of gene specific primers  
437 and 1X SYBR green master mix (Applied Biosystems; REF A25742) in Step-One plus from  
438 Applied Biosystems. *gyrA* was used as an internal control. Gene expression values ( $2^{-\Delta ct}$ ) were  
439 plotted after normalization with *gyrA*.

### 440 **Metabolite Extraction**

441 Metabolomics experiments were done according to previously published work (66, 67). Both  
442 wild-type and mutant strains were first grown in 5 ml LB broth (BD Difco™) media at 30 °C for  
443 12 hrs. and then diluted 1:50 in 40 ml media (in triplicates) to grow at 37°C. Mid-log phase  
444 cultures with OD<sub>600</sub> 0.4 were pelleted down and quenched by resuspending in 700 µl of a  
445 precooled 40%:40%:20% mixture of acetonitrile, methanol, and water. To extract metabolites,  
446 cells were lysed using 0.1 mm Zirconia beads and Precellys homogenizer (Bertin Instruments).  
447 Lysates were centrifuged at 12,000 RPM for 8 min at 37°C and cleared by passing through  
448 0.22 µm Spin-X tube filters (Sigma–Aldrich).

#### 449 **Liquid Chromatography and Mass Spectrometry**

450 2 µl of extracted metabolite samples were separated on a Cogent Diamond Hydride Type C  
451 Column of 1200 liquid chromatography (Agilent) which was coupled to an Agilent Accurate-  
452 Mass 6220 Time-of-Flight spectrometer. For different classes of metabolites, two types of  
453 solvents were used: Solvent A (H<sub>2</sub>O + 0.2% formic acid) and Solvent B (acetonitrile + 0.2%  
454 formic acid). Gradient was 0-2 min, 85% B; 3-5 min, 80% B; 6-7 min, 75% B; 8-9 min, 70% B;  
455 10-11.1 min, 50% B; 11.1-14 min 20% B; 14.1-24 min 5% B with a 10 min re-equilibration  
456 period at 85% B at a flow rate of 0.4 ml/min. For dynamic mass axis calibration, a reference  
457 mass solution was continuously injected from the isocratic pump. Ion abundances of different  
458 metabolites were determined using Profinder 8.0. Log<sub>2</sub> fold changes were calculated with respect  
459 to the abundances in the wild-type strain.

#### 460 **Statistical analysis**

461 All the experiments were performed with a minimum of 3 biological replicates. One-way  
462 ANOVA was used to calculate the statistical significance. Tukey's comparison test was used to

463 determine significance between all the strains. *P*-value cut-offs have been mentioned in the  
464 figure legends. Different letters represent data which are significantly different. Same letter  
465 represents mean values which are not statistically different. Significance between two strains was  
466 determined using student's t-test.

467

## 468 **Acknowledgments**

469 Research reported in this publication was supported by the National Institutes of Health under  
470 award number R35GM122461 to JDH and U19AI162584 and R25140472 to KYR. The content  
471 is solely the responsibility of the authors and does not necessarily represent the official views of  
472 the National Institutes of Health.

473

## 474 **References**

- 475 1. Storz G, Hengge R, American Society for Microbiology. 2011. Bacterial stress responses,  
476 2nd ed. ASM Press, Washington, DC.
- 477 2. Foster PL. 2007. Stress-induced mutagenesis in bacteria. *Crit Rev Biochem Mol Biol*  
478 42:373-97.
- 479 3. Cohen Y, Hershberg R. 2022. Rapid adaptation often occurs through mutations to the  
480 most highly conserved positions of the RNA polymerase core enzyme. *Genome Biol*  
481 Evol doi:10.1093/gbe/evac105.
- 482 4. LaCroix RA, Sandberg TE, O'Brien EJ, Utrilla J, Ebrahim A, Guzman GI, Szubin R,  
483 Palsson BO, Feist AM. 2015. Use of adaptive laboratory evolution to discover key

- 484 mutations enabling rapid growth of *Escherichia coli* K-12 MG1655 on glucose minimal  
485 medium. *Appl Environ Microbiol* 81:17-30.
- 486 5. Kuehne SA, Dempster AW, Collery MM, Joshi N, Jowett J, Kelly ML, Cave R,  
487 Longshaw CM, Minton NP. 2018. Characterization of the impact of *rpoB* mutations on  
488 the *in vitro* and *in vivo* competitive fitness of *Clostridium difficile* and susceptibility to  
489 fidaxomicin. *J Antimicrob Chemother* 73:973-980.
- 490 6. Panchal VV, Griffiths C, Mosaei H, Bilyk B, Sutton JAF, Carnell OT, Hornby DP, Green  
491 J, Hobbs JK, Kelley WL, Zenkin N, Foster SJ. 2020. Evolving MRSA: High-level beta-  
492 lactam resistance in *Staphylococcus aureus* is associated with RNA Polymerase  
493 alterations and fine tuning of gene expression. *PLoS Pathog* 16:e1008672.
- 494 7. Shiver AL, Osadnik H, Peters JM, Mooney RA, Wu PI, Henry KK, Braberg H, Krogan  
495 NJ, Hu JC, Landick R, Huang KC, Gross CA. 2021. Chemical-genetic interrogation of  
496 RNA polymerase mutants reveals structure-function relationships and physiological  
497 tradeoffs. *Mol Cell* 81:2201-2215 e9.
- 498 8. Ramaswamy S, Musser JM. 1998. Molecular genetic basis of antimicrobial agent  
499 resistance in *Mycobacterium tuberculosis*: 1998 update. *Tuber Lung Dis* 79:3-29.
- 500 9. Molodtsov V, Scharf NT, Stefan MA, Garcia GA, Murakami KS. 2017. Structural basis  
501 for rifamycin resistance of bacterial RNA polymerase by the three most clinically  
502 important RpoB mutations found in *Mycobacterium tuberculosis*. *Mol Microbiol*  
503 103:1034-1045.
- 504 10. Koch A, Mizrahi V, Warner DF. 2014. The impact of drug resistance on *Mycobacterium*  
505 *tuberculosis* physiology: what can we learn from rifampicin? *Emerg Microbes Infect*  
506 3:e17.



- 507 11. Mariam DH, Mengistu Y, Hoffner SE, Andersson DI. 2004. Effect of *rpoB* mutations  
508 conferring rifampin resistance on fitness of *Mycobacterium tuberculosis*. *Antimicrob*  
509 *Agents Chemother* 48:1289-94.
- 510 12. Xu M, Zhou YN, Goldstein BP, Jin DJ. 2005. Cross-resistance of *Escherichia coli* RNA  
511 polymerases conferring rifampin resistance to different antibiotics. *J Bacteriol* 187:2783-  
512 92.
- 513 13. Lahiri N, Shah RR, Layre E, Young D, Ford C, Murray MB, Fortune SM, Moody DB.  
514 2016. Rifampin Resistance Mutations Are Associated with Broad Chemical Remodeling  
515 of *Mycobacterium tuberculosis*. *J Biol Chem* 291:14248-14256.
- 516 14. Sonenshein AL, Losick R. 1970. RNA polymerase mutants blocked in sporulation.  
517 *Nature* 227:906-9.
- 518 15. Perkins AE, Nicholson WL. 2008. Uncovering new metabolic capabilities of *Bacillus*  
519 *subtilis* using phenotype profiling of rifampin-resistant *rpoB* mutants. *J Bacteriol*  
520 190:807-14.
- 521 16. Campodonico VL, Rifat D, Chuang YM, Ioerger TR, Karakousis PC. 2018. Altered  
522 *Mycobacterium tuberculosis* Cell Wall Metabolism and Physiology Associated With  
523 RpoB Mutation H526D. *Front Microbiol* 9:494.
- 524 17. Giddey AD, Ganief TA, Ganief N, Koch A, Warner DF, Soares NC, Blackburn JM.  
525 2021. Cell Wall Proteomics Reveal Phenotypic Adaption of Drug-Resistant  
526 *Mycobacterium smegmatis* to Subinhibitory Rifampicin Exposure. *Front Med (Lausanne)*  
527 8:723667.

- 528 18. Fajardo-Cavazos P, Leehan JD, Nicholson WL. 2018. Alterations in the Spectrum of  
529 Spontaneous Rifampicin-Resistance Mutations in the *Bacillus subtilis rpoB* Gene after  
530 Cultivation in the Human Spaceflight Environment. *Front Microbiol* 9:192.
- 531 19. Leehan JD, Nicholson WL. 2021. The Spectrum of Spontaneous Rifampin Resistance  
532 Mutations in the *Bacillus subtilis rpoB* Gene Depends on the Growth Environment. *Appl*  
533 *Environ Microbiol* 87:e0123721.
- 534 20. Leehan JD, Nicholson WL. 2022. Environmental Dependence of Competitive Fitness in  
535 Rifampin-Resistant *rpoB* Mutants of *Bacillus subtilis*. *Appl Environ Microbiol*  
536 88:e0242221.
- 537 21. Brandt CM, Rouse MS, Tallan BM, Laue NW, Wilson WR, Steckelberg JM. 1995.  
538 Effective treatment of cephalosporin-rifampin combinations against cryptic methicillin-  
539 resistant beta-lactamase-producing coagulase-negative staphylococcal experimental  
540 endocarditis. *Antimicrob Agents Chemother* 39:1815-9.
- 541 22. Kaushik A, Makkar N, Pandey P, Parrish N, Singh U, Lamichhane G. 2015.  
542 Carbapenems and Rifampin Exhibit Synergy against *Mycobacterium tuberculosis* and  
543 *Mycobacterium abscessus*. *Antimicrob Agents Chemother* 59:6561-7.
- 544 23. Patel Y, Zhao H, Helmann JD. 2020. A regulatory pathway that selectively up-regulates  
545 elongasome function in the absence of class A PBPs. *Elife* 9.
- 546 24. Yadav B, Wennerberg K, Aittokallio T, Tang J. 2015. Searching for Drug Synergy in  
547 Complex Dose-Response Landscapes Using an Interaction Potency Model. *Comput*  
548 *Struct Biotechnol J* 13:504-13.
- 549 25. Konate K, Mavoungou JF, Lepengue AN, Aworet-Samseny RR, Hilou A, Souza A,  
550 Dicko MH, M'Batchi B. 2012. Antibacterial activity against beta- lactamase producing

- 551 Methicillin and Ampicillin-resistants *Staphylococcus aureus*: Fractional Inhibitory  
552 Concentration Index (FICI) determination. *Ann Clin Microbiol Antimicrob* 11:18.
- 553 26. Michel JB, Yeh PJ, Chait R, Moellering RC, Jr., Kishony R. 2008. Drug interactions  
554 modulate the potential for evolution of resistance. *Proc Natl Acad Sci U S A* 105:14918-  
555 23.
- 556 27. Aiba Y, Katayama Y, Hishinuma T, Murakami-Kuroda H, Cui L, Hiramatsu K. 2013.  
557 Mutation of RNA polymerase beta-subunit gene promotes heterogeneous-to-  
558 homogeneous conversion of beta-lactam resistance in methicillin-resistant  
559 *Staphylococcus aureus*. *Antimicrob Agents Chemother* 57:4861-71.
- 560 28. Jin DJ, Gross CA. 1988. Mapping and sequencing of mutations in the *Escherichia coli*  
561 *rpoB* gene that lead to rifampicin resistance. *J Mol Biol* 202:45-58.
- 562 29. Vogler AJ, Busch JD, Percy-Fine S, Tipton-Hunton C, Smith KL, Keim P. 2002.  
563 Molecular analysis of rifampin resistance in *Bacillus anthracis* and *Bacillus cereus*.  
564 *Antimicrob Agents Chemother* 46:511-3.
- 565 30. Muthaiah M, Shivekar SS, Cuppusamy Kapalamurthy VR, Alagappan C, Sakkaravarthy  
566 A, Brammachary U. 2017. Prevalence of mutations in genes associated with rifampicin  
567 and isoniazid resistance in *Mycobacterium tuberculosis* clinical isolates. *J Clin Tuberc*  
568 *Other Mycobact Dis* 8:19-25.
- 569 31. Hauck Y, Fabre M, Vergnaud G, Soler C, Pourcel C. 2009. Comparison of two  
570 commercial assays for the characterization of *rpoB* mutations in *Mycobacterium*  
571 *tuberculosis* and description of new mutations conferring weak resistance to rifampicin. *J*  
572 *Antimicrob Chemother* 64:259-62.

- 573 32. Nicholson WL, Maughan H. 2002. The spectrum of spontaneous rifampin resistance  
574 mutations in the *rpoB* gene of *Bacillus subtilis* 168 spores differs from that of vegetative  
575 cells and resembles that of *Mycobacterium tuberculosis*. *J Bacteriol* 184:4936-40.
- 576 33. De Jager V, Gupte N, Nunes S, Barnes GL, van Wijk RC, Mostert J, Dorman SE,  
577 Abulfathi AA, Upton CM, Faraj A, Nuermberger EL, Lamichhane G, Svensson EM,  
578 Simonsson USH, Diacon AH, Dooley KE. 2022. Early Bactericidal Activity of  
579 Meropenem plus Clavulanate (with or without Rifampin) for Tuberculosis: The  
580 COMRADE Randomized, Phase 2A Clinical Trial. *Am J Respir Crit Care Med*  
581 205:1228-1235.
- 582 34. Beckley AM, Wright ES. 2021. Identification of antibiotic pairs that evade concurrent  
583 resistance via a retrospective analysis of antimicrobial susceptibility test results. *Lancet*  
584 *Microbe* 2:e545-e554.
- 585 35. Sharifzadeh S, Dempwolff F, Kearns DB, Carlson EE. 2020. Harnessing beta-Lactam  
586 Antibiotics for Illumination of the Activity of Penicillin-Binding Proteins in *Bacillus*  
587 *subtilis*. *ACS Chem Biol* 15:1242-1251.
- 588 36. Watanakunakorn C. 1984. Mode of action and *in-vitro* activity of vancomycin. *J*  
589 *Antimicrob Chemother* 14 Suppl D:7-18.
- 590 37. Wiedemann I, Breukink E, van Kraaij C, Kuipers OP, Bierbaum G, de Kruijff B, Sahl  
591 HG. 2001. Specific binding of nisin to the peptidoglycan precursor lipid II combines pore  
592 formation and inhibition of cell wall biosynthesis for potent antibiotic activity. *J Biol*  
593 *Chem* 276:1772-9.
- 594 38. Silver LL. 2017. Fosfomycin: Mechanism and Resistance. *Cold Spring Harb Perspect*  
595 *Med* 7.

- 596 39. Schlunzen F, Zarivach R, Harms J, Bashan A, Tocilj A, Albrecht R, Yonath A,  
597 Franceschi F. 2001. Structural basis for the interaction of antibiotics with the peptidyl  
598 transferase centre in eubacteria. *Nature* 413:814-21.
- 599 40. Heath RJ, Rubin JR, Holland DR, Zhang E, Snow ME, Rock CO. 1999. Mechanism of  
600 triclosan inhibition of bacterial fatty acid synthesis. *J Biol Chem* 274:11110-4.
- 601 41. Carr RJ, Bilton RF, Atkinson T. 1986. Toxicity of paraquat to microorganisms. *Appl*  
602 *Environ Microbiol* 52:1112-6.
- 603 42. Collins JA, Irnov I, Baker S, Winkler WC. 2007. Mechanism of mRNA destabilization  
604 by the *glmS* ribozyme. *Genes Dev* 21:3356-68.
- 605 43. Winkler WC, Nahvi A, Roth A, Collins JA, Breaker RR. 2004. Control of gene  
606 expression by a natural metabolite-responsive ribozyme. *Nature* 428:281-6.
- 607 44. Gague I, Oberto J, Plumbridge J. 2014. Regulation of amino sugar utilization in *Bacillus*  
608 *subtilis* by the GntR family regulators, NagR and GamR. *Mol Microbiol* 92:100-15.
- 609 45. Bertram R, Rigali S, Wood N, Lulko AT, Kuipers OP, Titgemeyer F. 2011. Regulon of  
610 the N-acetylglucosamine utilization regulator NagR in *Bacillus subtilis*. *J Bacteriol*  
611 193:3525-36.
- 612 46. McCarthy TJ, Plog MA, Floy SA, Jansen JA, Soukup JK, Soukup GA. 2005. Ligand  
613 requirements for *glmS* ribozyme self-cleavage. *Chem Biol* 12:1221-6.
- 614 47. Patel V, Wu Q, Chandrangsu P, Helmann JD. 2018. A metabolic checkpoint protein  
615 GlmR is important for diverting carbon into peptidoglycan biosynthesis in *Bacillus*  
616 *subtilis*. *PLoS Genet* 14:e1007689.

- 617 48. Foulquier E, Pompeo F, Byrne D, Fierobe HP, Galinier A. 2020. Uridine diphosphate N-  
618 acetylglucosamine orchestrates the interaction of GlmR with either YvcJ or GlmS in  
619 *Bacillus subtilis*. Sci Rep 10:15938.
- 620 49. Zhu Y, Eiteman MA, Altman R, Altman E. 2008. High glycolytic flux improves pyruvate  
621 production by a metabolically engineered *Escherichia coli* strain. Appl Environ  
622 Microbiol 74:6649-55.
- 623 50. Alvarez-Anorve LI, Gaugue I, Link H, Marcos-Viquez J, Diaz-Jimenez DM, Zonszein S,  
624 Bustos-Jaimes I, Schmitz-Afonso I, Calcagno ML, Plumbridge J. 2016. Allosteric  
625 Activation of *Escherichia coli* Glucosamine-6-Phosphate Deaminase (NagB) In Vivo  
626 Justified by Intracellular Amino Sugar Metabolite Concentrations. J Bacteriol 198:1610-  
627 1620.
- 628 51. Patel V, Black KA, Rhee KY, Helmann JD. 2019. *Bacillus subtilis* PgcA moonlights as a  
629 phosphoglucosamine mutase in support of peptidoglycan synthesis. PLoS Genet  
630 15:e1008434.
- 631 52. Bollenbach T. 2015. Antimicrobial interactions: mechanisms and implications for drug  
632 discovery and resistance evolution. Curr Opin Microbiol 27:1-9.
- 633 53. Arenaz-Callao MP, Gonzalez Del Rio R, Lucia Quintana A, Thompson CJ, Mendoza-  
634 Losana A, Ramon-Garcia S. 2019. Triple oral beta-lactam containing therapy for Buruli  
635 ulcer treatment shortening. PLoS Negl Trop Dis 13:e0007126.
- 636 54. Jiang Z, He X, Li J. 2018. Synergy effect of meropenem-based combinations against  
637 *Acinetobacter baumannii*: a systematic review and meta-analysis. Infect Drug Resist  
638 11:1083-1095.

- 639 55. Ramon-Garcia S, Gonzalez Del Rio R, Villarejo AS, Sweet GD, Cunningham F, Barros  
640 D, Ballell L, Mendoza-Losana A, Ferrer-Bazaga S, Thompson CJ. 2016. Repurposing  
641 clinically approved cephalosporins for tuberculosis therapy. *Sci Rep* 6:34293.
- 642 56. Tangden T, Hickman RA, Forsberg P, Lagerback P, Giske CG, Cars O. 2014. Evaluation  
643 of double- and triple-antibiotic combinations for VIM- and NDM-producing *Klebsiella*  
644 *pneumoniae* by in vitro time-kill experiments. *Antimicrob Agents Chemother* 58:1757-  
645 62.
- 646 57. Rodriguez de Evgrafov M, Gumpert H, Munck C, Thomsen TT, Sommer MO. 2015.  
647 Collateral Resistance and Sensitivity Modulate Evolution of High-Level Resistance to  
648 Drug Combination Treatment in *Staphylococcus aureus*. *Mol Biol Evol* 32:1175-85.
- 649 58. Cui L, Isii T, Fukuda M, Ochiai T, Neoh HM, Camargo IL, Watanabe Y, Shoji M,  
650 Hishinuma T, Hiramatsu K. 2010. An RpoB mutation confers dual heteroresistance to  
651 daptomycin and vancomycin in *Staphylococcus aureus*. *Antimicrob Agents Chemother*  
652 54:5222-33.
- 653 59. Rasouly A, Shamovsky Y, Epshtein V, Tam K, Vasilyev N, Hao Z, Quarta G, Pani B, Li  
654 L, Vallin C, Shamovsky I, Krishnamurthy S, Shtilerman A, Vantine S, Torres VJ, Nudler  
655 E. 2021. Analysing the fitness cost of antibiotic resistance to identify targets for  
656 combination antimicrobials. *Nat Microbiol* 6:1410-1423.
- 657 60. Lobritz MA, Andrews IW, Braff D, Porter CBM, Gutierrez A, Furuta Y, Cortes LBG,  
658 Ferrante T, Bening SC, Wong F, Gruber C, Bakerlee CW, Lambert G, Walker GC,  
659 Dwyer DJ, Collins JJ. 2021. Increased energy demand from anabolic-catabolic processes  
660 drives beta-lactam antibiotic lethality. *Cell Chem Biol*  
661 doi:10.1016/j.chembiol.2021.12.010.

- 662 61. Mir M, Prusic S, Kang CM, Lun S, Guo H, Murry JP, Rubin EJ, Husson RN. 2014.  
663 Mycobacterial gene *cuvA* is required for optimal nutrient utilization and virulence. *Infect*  
664 *Immun* 82:4104-17.
- 665 62. Pensinger DA, Boldon KM, Chen GY, Vincent WJ, Sherman K, Xiong M, Schaezner AJ,  
666 Forster ER, Coers J, Striker R, Sauer JD. 2016. The *Listeria monocytogenes* PASTA  
667 Kinase PrkA and Its Substrate YvcK Are Required for Cell Wall Homeostasis,  
668 Metabolism, and Virulence. *PLoS Pathog* 12:e1006001.
- 669 63. Koo BM, Kritikos G, Farelli JD, Todor H, Tong K, Kimsey H, Wapinski I, Galardini M,  
670 Cabal A, Peters JM, Hachmann AB, Rudner DZ, Allen KN, Typas A, Gross CA. 2017.  
671 Construction and Analysis of Two Genome-Scale Deletion Libraries for *Bacillus subtilis*.  
672 *Cell Syst* 4:291-305 e7.
- 673 64. Hsieh MH, Yu CM, Yu VL, Chow JW. 1993. Synergy assessed by checkerboard. A  
674 critical analysis. *Diagn Microbiol Infect Dis* 16:343-9.
- 675 65. Odds FC. 2003. Synergy, antagonism, and what the chequerboard puts between them. *J*  
676 *Antimicrob Chemother* 52:1.
- 677 66. Planck KA, Rhee K. 2021. Metabolomics of *Mycobacterium tuberculosis*. *Methods Mol*  
678 *Biol* 2314:579-593.
- 679 67. Wang Z, Soni V, Marriner G, Kaneko T, Boshoff HIM, Barry CE, 3rd, Rhee KY. 2019.  
680 Mode-of-action profiling reveals glutamine synthetase as a collateral metabolic  
681 vulnerability of *M. tuberculosis* to bedaquiline. *Proc Natl Acad Sci U S A* 116:19646-  
682 19651.

683

684



685 **Figure Legends**

686 **Figure 1: Synergy between rifampicin (RIF) and cefuroxime (CEF) monitored by growth**  
687 **kinetics.** Cell density was monitored after treatment with (A) sub-MIC levels of CEF alone, or  
688 (B) in the presence of 0.06 µg/mL RIF. The observed lag phases were all less than 5 hr with  
689 CEF alone and increased to nearly 15 hr with the combination treatment, as highlighted by the  
690 the dashed lines.

691

692 **Figure 2: Evolution of WT *B. subtilis* to achieve RIF and CEF resistance.** (A) Schematic of  
693 the evolution experiment carried out in the presence of the RIF+CEF combination (B) RIF and  
694 (C) CEF susceptibilities as measured by zone of inhibition for the 10 passages evolved under the  
695 3 combination treatments. The three RIF and CEF concentrations used for evolving the cells has  
696 been mentioned in the legend. The control group consists of 10 passages of WT cells that have  
697 not been treated with any drugs. The shaded bars in (C) represent zone of lower density.

698

699 **Figure 3 Drug susceptibilities of *rpoB* mutants** (A) Zone of inhibition against RIF and CEF for  
700 different *rpoB* mutants (note that only P520L had a detectable inhibition zone with RIF). (B)  
701 Zone of inhibition for β-lactams oxacillin, ampicillin and penicillin and other cell wall inhibiting  
702 drugs like nisin, vancomycin and fosfomycin for the common clinically associated RIF resistant  
703 *rpoB* mutants. The letters indicate the significance of the sensitivity of each strain compared to  
704 all others treated with the same antibiotic with *p*-value <0.001 (no comparisons were done  
705 between drugs).

706

707 **Figure 4 The effect of *rpoB* mutations on peptidoglycan (PG) synthesis** (A) The schematic of  
708 PG synthesis pathway. The expression levels of (B) enzymes (C) regulators involved in PG  
709 synthesis in WT, and the *rpoB* mutants S487L, H482Y and Q469R as determined by real-time  
710 PCR. The expression levels were calculated by the  $2^{-\Delta C_t}$  method. *gyrA* was used as the internal  
711 control to normalize the levels of the genes of interest. The values are plotted on log<sub>10</sub> scale.  
712 Significance was calculated using two-way ANOVA with Tukey's multiple comparisons test.  
713 The \*\* indicates *p*-value less than 0.001.

714

715 **Figure 5 Metabolite levels in *rpoB* mutants** (A) Metabolite levels of pyruvate which indicate  
716 the flux through glycolysis (B) Metabolite levels of GlcN-6-P which determine flux into PG  
717 synthesis (C) Metabolite levels of UDP-GlcNAc which indicate the rate of PG formation. Same  
718 letters define dataset with no significant difference. Different letters define a significant  
719 difference of *p*-value less than 0.0001 amongst the mutants.

720

721 **Figure 6 The importance of GlmR activity in CEF sensitivity** The sensitivity of WT and *rpoB*  
722 mutants with and without the deletion of *glmR* as measured by zone of inhibition. An \* indicates  
723 *p*-value less than 0.0001.

724

725 **Figure 7 Perturbation of GlcN-6-P and UDP-GlcNAc levels in the cells** The sensitivity of WT  
726 and *rpoB* mutants against CEF as measured by zone of inhibition on (A) media supplemented  
727 with 20 mM GlcNAc and on deletion of *gamA* which directs GlcN-6-P towards glycolysis (B) on

728 induction of the phosphoglucosaminemutase *glmM* and *pgcA*\* and phosphoglucomutase *pgcA*.  
729 An \* indicates *p*-value less than 0.01.

730

731 **Figure 8: Interpretation of experimental perturbations predicted to affect UDP-GlcNAc**  
732 **levels.** The text and arrow in blue summarize the data for the CEF<sup>R</sup> S487L mutant. This mutant  
733 has low levels of UDP-GlcNAc. Thus, GlmR is free to stimulate GlmS activity and cells are  
734 predicted to maintain a high rate of PG synthesis detected by high levels of GlcN-6-P. The text  
735 and arrow in red summarize the data for CEF<sup>S</sup> H482Y mutant. This mutant has high levels of  
736 UDP-GlcNAc which would bind with GlmR. The bound GlmR is unavailable to stimulate GlmS  
737 activity and is thereby predicted to reduce PG synthesis. Three perturbation scenarios are also  
738 presented. In green, cells were supplemented with 20 mM GlcNAc or *gamA* was deleted. Both  
739 led to higher flux towards PG synthesis independent of GlmS thereby bypassing the bottleneck in  
740 the H482Y mutant and leading to elevated CEF resistance. In orange, induction of *glmM* or  
741 *pgcA*\* is predicted to increase the levels of UDP-GlcNAc, but only in S487L which has high  
742 levels of GlcN-6-P. Thus, this treatment is predicted to block GlmR-dependent GlmS activation  
743 in S487L, reduce PG synthesis, and thereby contribute to CEF sensitivity. These inferences are  
744 supported by analysis of the effects of a *glmR* deletion (purple). In S487L we observed low  
745 UDP-GlcNAc levels and predict that GlmR is activating GlmS. Consistently, deletion of *glmR*  
746 makes the S487L strain more CEF sensitive. In contrast, in H482Y we predict that the high  
747 observed UDP-GlcNAc levels will keep GlmR sequestered in an inactive state, and consistently  
748 there is no effect of deleting *glmR*.

749

750 **Tables**

751 **Table 1: ZIP scores for the combination of 0.06 µg/mL RIF with increasing concentrations**

752 **of CEF**

| RIF (µg/mL) | CEF (µg/mL) | ZIP score |
|-------------|-------------|-----------|
| 0.06        | 0           | 0.0       |
| 0.06        | 0.04        | 61.7      |
| 0.06        | 0.08        | 69.1      |
| 0.06        | 0.16        | 65.7      |
| 0.06        | 0.32        | 55.8      |
| 0.06        | 0.64        | 43.1      |
| 0.06        | 1.28        | 27.6      |
| 0.06        | 2.56        | 14.3      |
| 0.06        | 5.12        | 5.2       |
| 0.06        | 10.24       | 0.0       |

753

754

755 Table 2: The mutations identified by WGS after evolution.

| Drug combination        | Gene        | Coding region change | Amino acid change |
|-------------------------|-------------|----------------------|-------------------|
| Strain A (0.06R+ 2.56C) | <i>rpoB</i> | 1460 C>T             | Ser487Leu         |
| Strain B (0.12R+ 2.56C) | <i>rpoB</i> | 1460 C>T             | Ser487Leu         |
| Strain C (0.06R+ 5.12C) | <i>rpoB</i> | 1559 C>T             | Pro520Leu         |

756

757

758 Table 3: RIF and CEF MICs of different *rpoB* mutants: graded in red for resistance and  
759 green for sensitivity compared to WT.

| Mutation<br>( <i>B. subtilis</i> ) | <i>E. coli</i><br>locus | <i>M. tuberculosis</i><br>locus | RIF MIC<br>( $\mu\text{g/mL}$ ) | CEF MIC<br>( $\mu\text{g/mL}$ ) |
|------------------------------------|-------------------------|---------------------------------|---------------------------------|---------------------------------|
| WT                                 |                         |                                 | 0.125                           | 5.12                            |
| H482Y                              | H526Y                   | H445Y                           | >4                              | 0.16                            |
| Q469R                              | Q513R                   | Q432R                           | >4                              | 10.24                           |
| S487L                              | S531L                   | S450L                           | >4                              | 20.48                           |
| P520L                              | P562L                   | P481L                           | 4                               | 20.48                           |

760

**Mutations in *rpoB* that confer rifampicin resistance can alter levels of peptidoglycan precursors and affect  $\beta$ -lactam susceptibility**

Short title: *rpoB* mutants and  $\beta$ -lactam susceptibility

Yesha Patel<sup>a</sup>, Vijay Soni<sup>b</sup>, Kyu Y. Rhee<sup>b</sup>, John D. Helmann<sup>a\*</sup>

<sup>a</sup>Department of Microbiology, Cornell University, Ithaca NY 14853-8101

<sup>b</sup>Department of Medicine, Division of Infectious Diseases, Weill Cornell Medicine, New York NY 10021-5608

\*Corresponding author: John D. Helmann, Telephone: 607-255-3086, Fax: 607-255-3904, Email: [jdh9@cornell.edu](mailto:jdh9@cornell.edu)

ORCID IDS: [orcid.org/0000-0001-9888-9888](https://orcid.org/0000-0001-9888-9888) (YP), [orcid.org/0000-0002-3395-7429](https://orcid.org/0000-0002-3395-7429) (VS), [orcid.org/0000-0003-4582-2895](https://orcid.org/0000-0003-4582-2895) (KYR), [orcid.org/0000-0002-3832-3249](https://orcid.org/0000-0002-3832-3249) (JDH)

Co-author emails: [ysp6@cornell.edu](mailto:ysp6@cornell.edu), [vis2032@med.cornell.edu](mailto:vis2032@med.cornell.edu), [kyr9001@med.cornell.edu](mailto:kyr9001@med.cornell.edu)

## Graphical Abstract

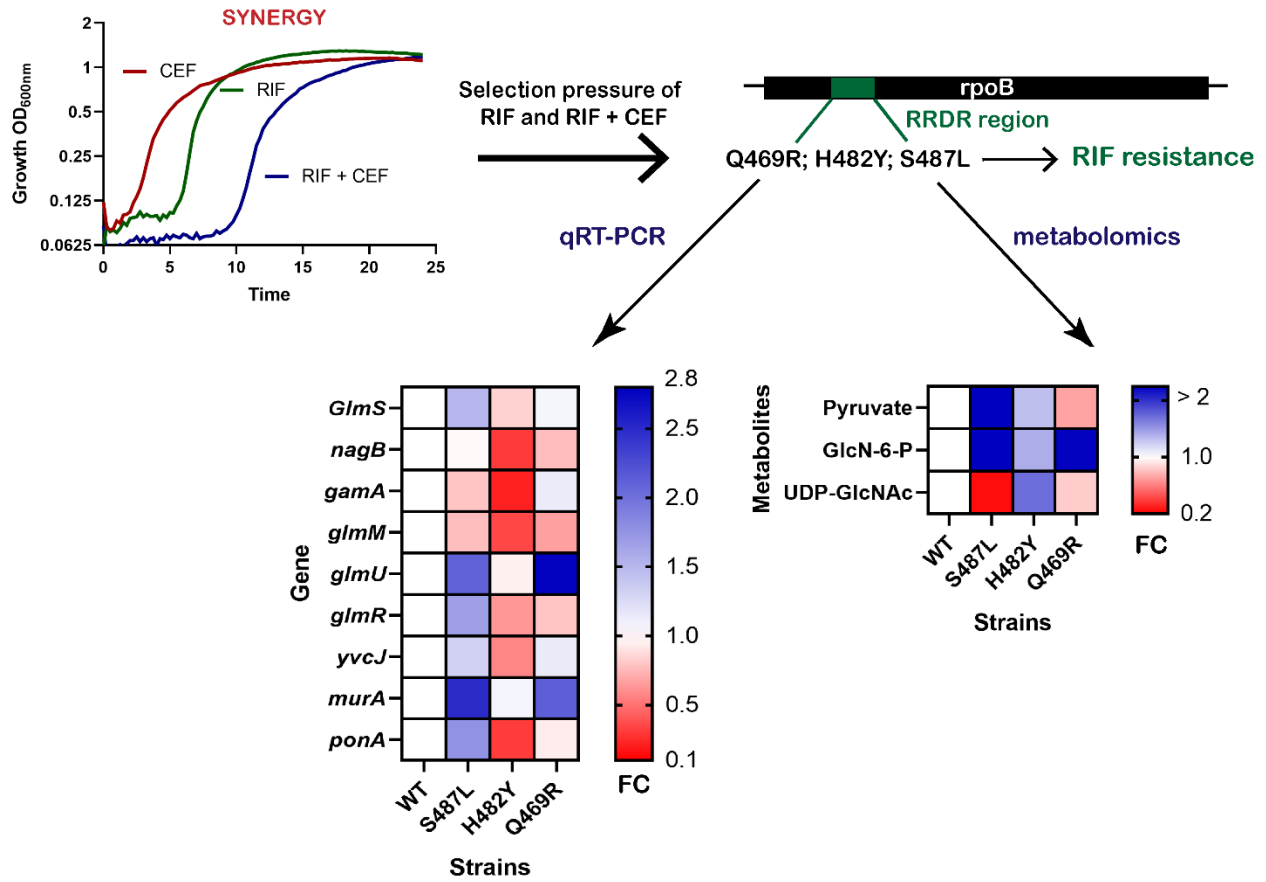

**Figure 1**

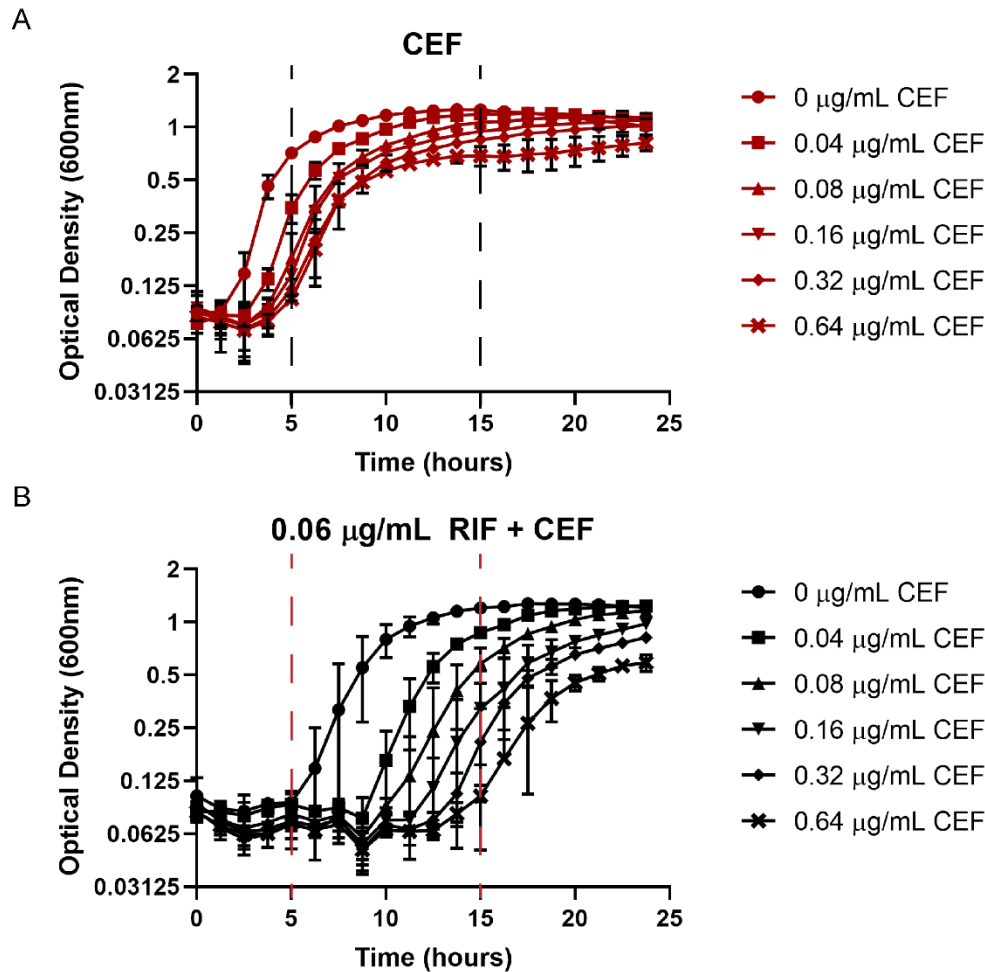

**Figure 1: Synergy between rifampicin (RIF) and cefuroxime (CEF) monitored by growth kinetics.** Cell density was monitored after treatment with (A) sub-MIC levels of CEF alone, or (B) in the presence of 0.06 µg/mL RIF. The observed lag phases were all less than 5 hr with CEF alone and increased to nearly 15 hr with the combination treatment, as highlighted by the the dashed lines.



**Figure 2**

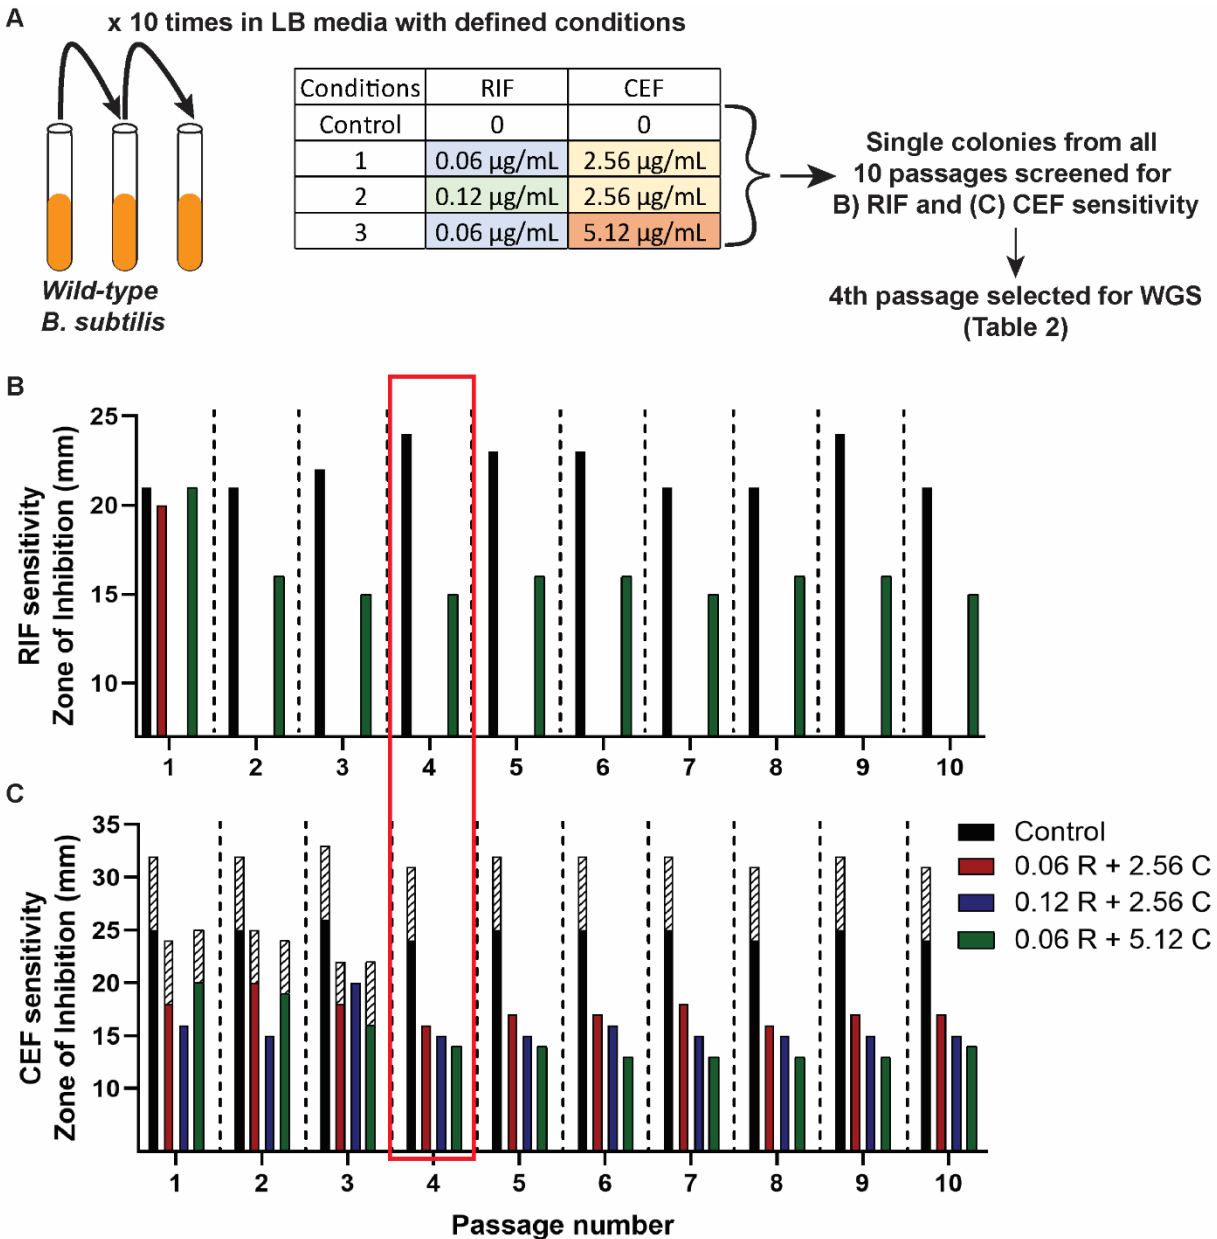

**Figure 2: Evolution of WT *B. subtilis* to achieve RIF and CEF resistance.** (A) Schematic of the evolution experiment carried out in the presence of the RIF+CEF combination (B) RIF and (C) CEF susceptibilities as measured by zone of inhibition for the 10 passages evolved under the 3 combination treatments. The three RIF and CEF concentrations used for evolving the cells has

been mentioned in the legend. The control group consists of 10 passages of WT cells that have not been treated with any drugs. The shaded bars in (C) represent zone of lower density.

**Figure 3**

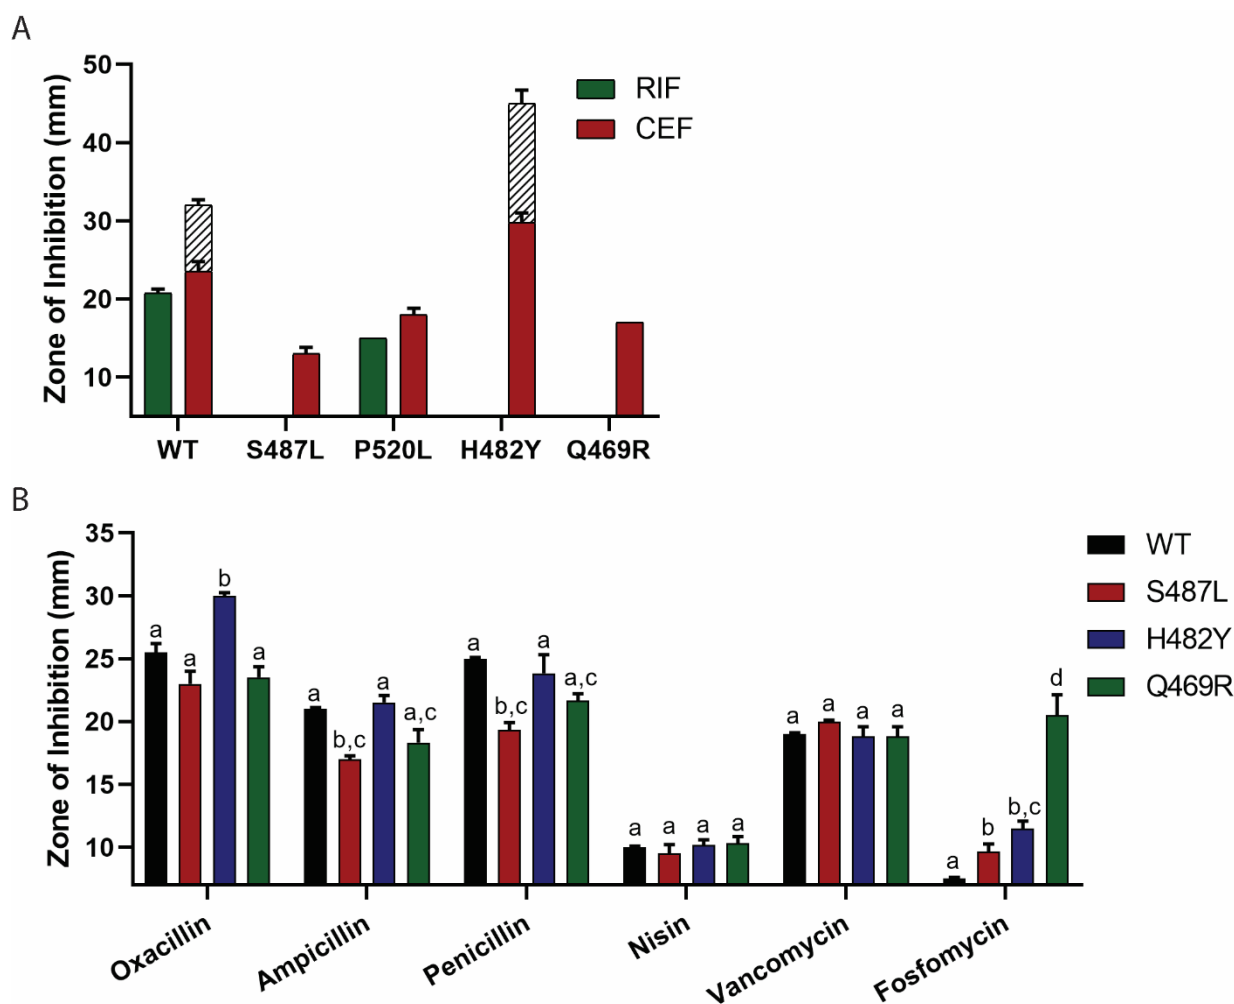

**Figure 3 Drug susceptibilities of *rpoB* mutants** (A) Zone of inhibition against RIF and CEF for different *rpoB* mutants (note that only P520L had a detectable inhibition zone with RIF). (B) Zone of inhibition for  $\beta$ -lactams oxacillin, ampicillin and penicillin and other cell wall inhibiting drugs like nisin, vancomycin and fosfomycin for the common clinically associated RIF resistant *rpoB* mutants. The letters indicate the significance of the sensitivity of each strain compared to all others treated with the same antibiotic with  $p$ -value  $<0.001$  (no comparisons were done between drugs).

**Figure 4**

**A**

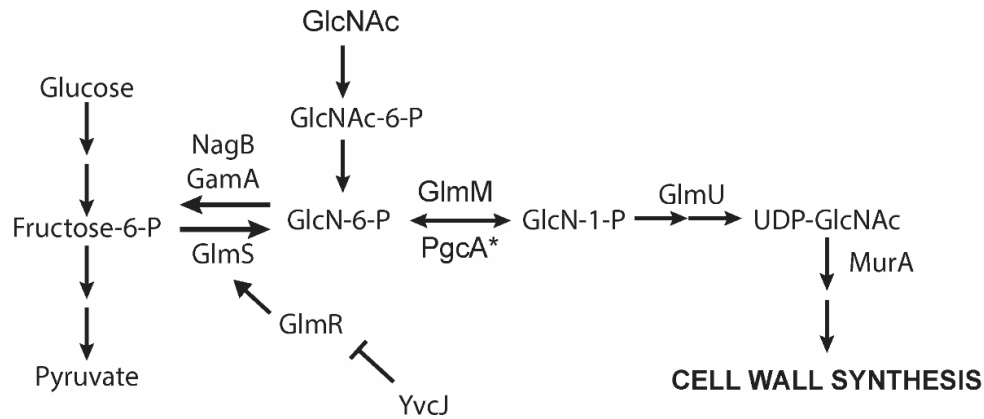

**B**

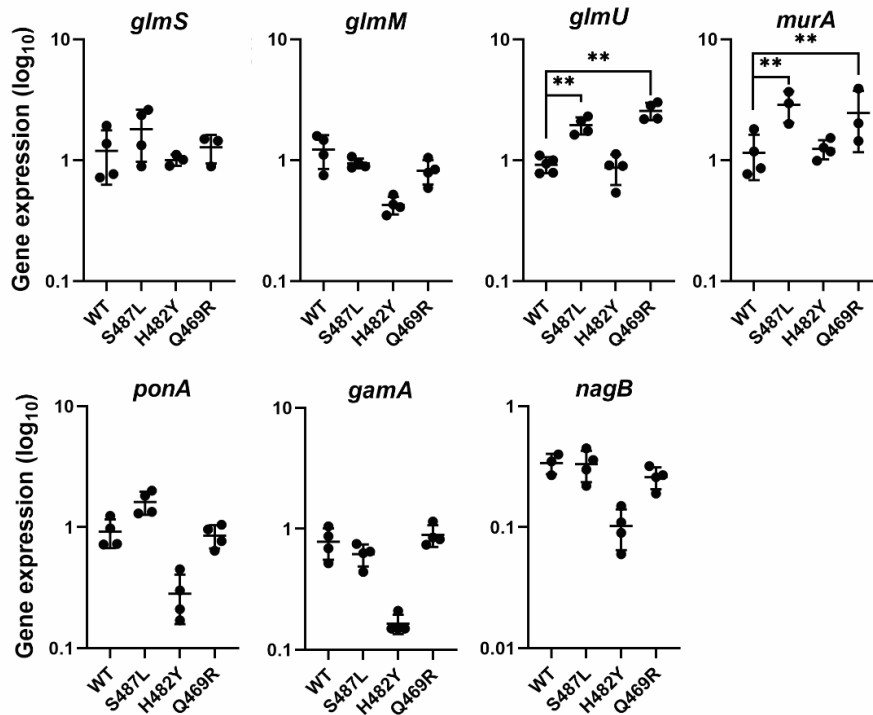

**C**

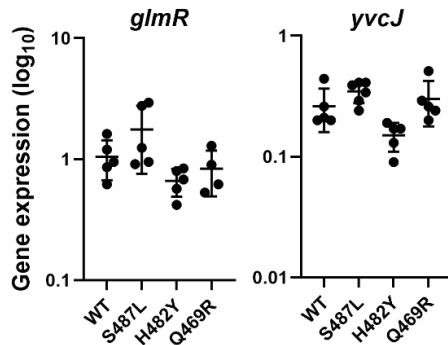

**Figure 4 The effect of *rpoB* mutations on peptidoglycan (PG) synthesis** (A) The schematic of PG synthesis pathway. The expression levels of (B) enzymes (C) regulators involved in PG synthesis in WT, and the *rpoB* mutants S487L, H482Y and Q469R as determined by real-time PCR. The expression levels were calculated by the  $2^{-\Delta C_T}$  method. *gyrA* was used as the internal control to normalize the levels of the genes of interest. The values are plotted on log<sub>10</sub> scale. Significance was calculated using two-way ANOVA with Tukey's multiple comparisons test. The \*\* indicates *p*-value less than 0.001.

**Figure 5**

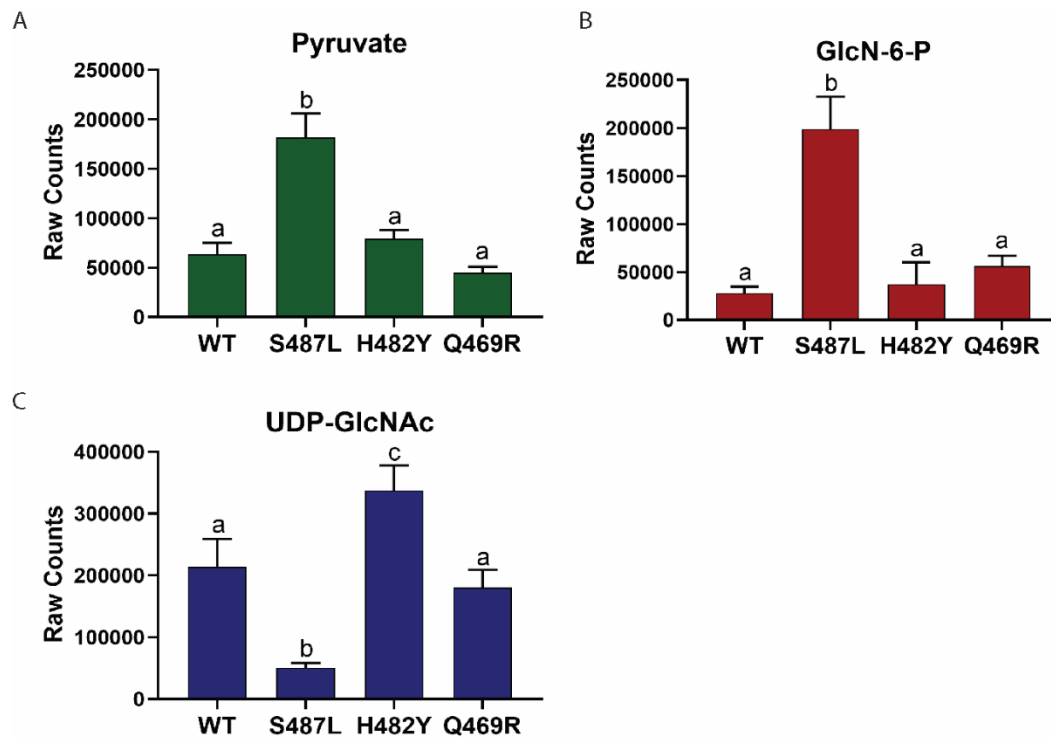

**Figure 5 Metabolite levels in *rpoB* mutants** (A) Metabolite levels of pyruvate which indicate the flux through glycolysis (B) Metabolite levels of GlcN-6-P which determine flux into PG synthesis (C) Metabolite levels of UDP-GlcNAc which indicate the rate of PG formation. Same letters define dataset with no significant difference. Different letters define a significant difference of *p*-value less than 0.0001 amongst the mutants.

**Figure 6**

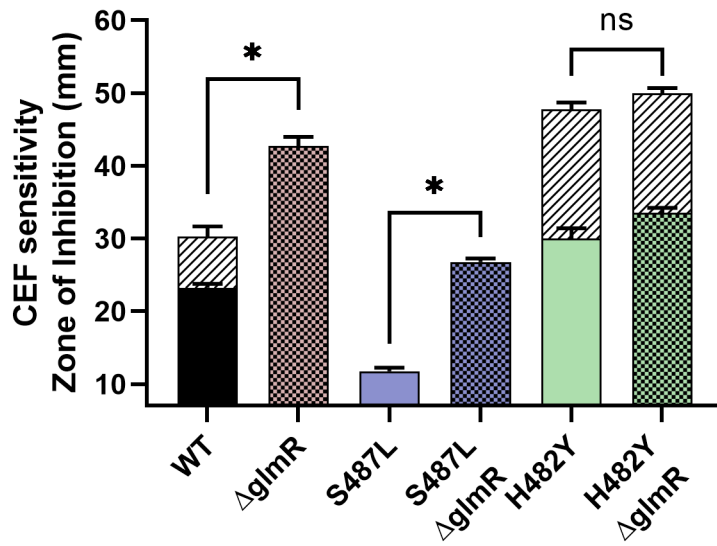

**Figure 6 The importance of GlmR activity in CEF sensitivity** The sensitivity of WT and *rpoB* mutants with and without the deletion of *glmR* as measured by zone of inhibition. An \* indicates *p*-value less than 0.0001.

**Figure 7**

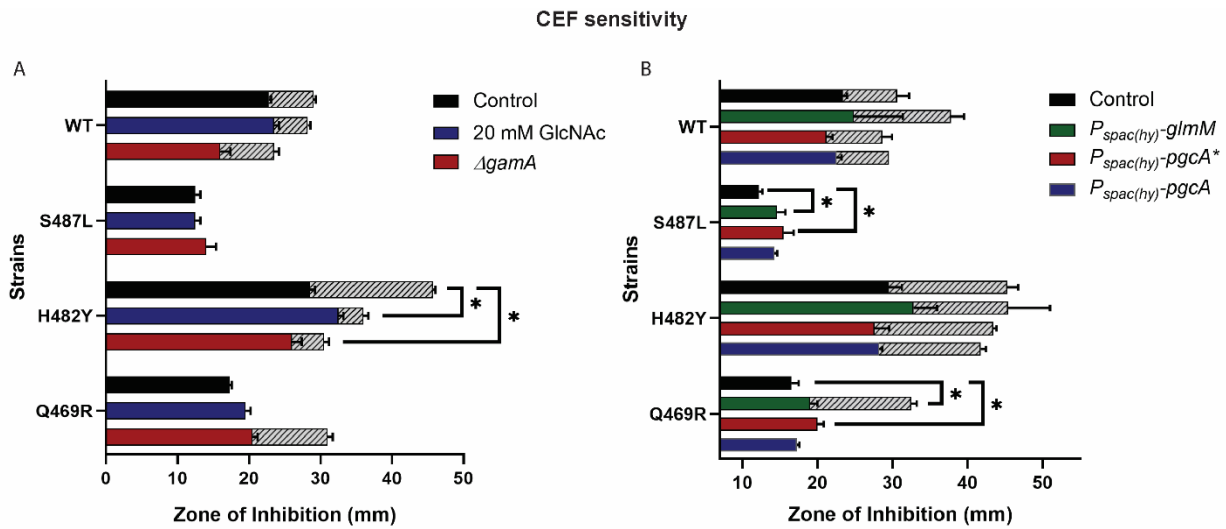

**Figure 7 Perturbation of GlcN-6-P and UDP-GlcNAc levels in the cells** The sensitivity of WT and *rpoB* mutants against CEF as measured by zone of inhibition on (A) media supplemented with 20 mM GlcNAc and on deletion of *gamA* which directs GlcN-6-P towards glycolysis (B) on induction of the phosphoglucosaminemutase *glmM* and *pgcA\** and phosphoglucomutase *pgcA*. An \* indicates *p*-value less than 0.01.



**Figure 8**

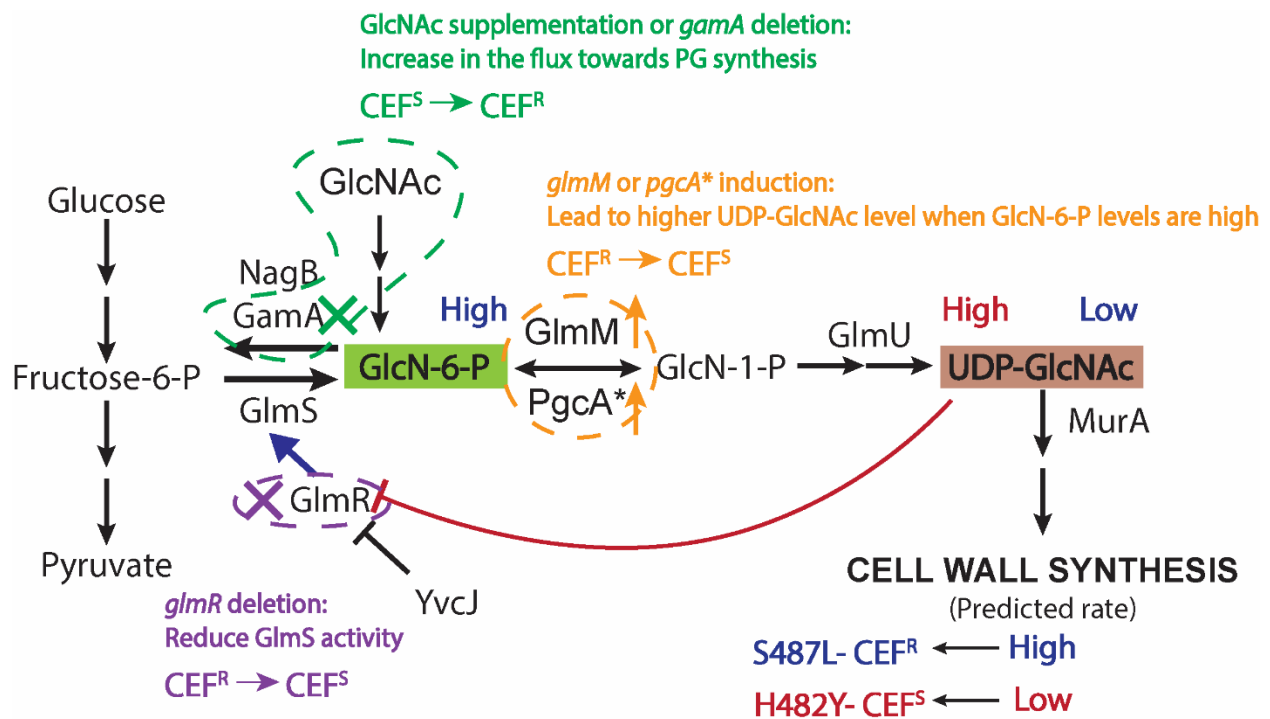

**Figure 8: Interpretation of experimental perturbations predicted to affect UDP-GlcNAc levels.** The text and arrow in blue summarize the data for the CEF<sup>R</sup> S487L mutant. This mutant has low levels of UDP-GlcNAc. Thus, GlmR is free to stimulate GlmS activity and cells are predicted to maintain a high rate of PG synthesis detected by high levels of GlcN-6-P. The text and arrow in red summarize the data for CEF<sup>S</sup> H482Y mutant. This mutant has high levels of UDP-GlcNAc which would bind with GlmR. The bound GlmR is unavailable to stimulate GlmS activity and is thereby predicted to reduce PG synthesis. Three perturbation scenarios are also presented. In green, cells were supplemented with 20 mM GlcNAc or *gamA* was deleted. Both led to higher flux towards PG synthesis independent of GlmS thereby bypassing the bottleneck in the H482Y mutant and leading to elevated CEF resistance. In orange, induction of *glmM* or *pgcA\** is predicted

to increase the levels of UDP-GlcNAc, but only in S487L which has high levels of GlcN-6-P. Thus, this treatment is predicted to block GlmR-dependent GlmS activation in S487L, reduce PG synthesis, and thereby contribute to CEF sensitivity. These inferences are supported by analysis of the effects of a *glmR* deletion (purple). In S487L we observed low UDP-GlcNAc levels and predict that GlmR is activating GlmS. Consistently, deletion of *glmR* makes the S487L strain more CEF sensitive. In contrast, in H482Y we predict that the high observed UDP-GlcNAc levels will keep GlmR sequestered in an inactive state, and consistently there is no effect of deleting *glmR*.
